# Supplementary material for: A self-organising biomimetic collagen/nano-hydroxyapatite-glycosaminoglycan scaffold for spinal fusion
Source: Springer Nature journal article supplement (doi:10.1007/s10853-017-1229-9), 2017-07-28
Supplement: MOESM1 [file 13336884]

## Supplementary Material 1

| Primer Name           | Sequence                |
|-----------------------|-------------------------|
| ALP f                 | ACCACCACGAGAGTGAACCA    |
| ALP r                 | CGTTGTCTGAGTACCAGTCCC   |
| BGLAP (Osteocalcin) f | TCACACTCCTCGCCCTATT     |
| BGLAP (Osteocalcin) r | TGAAAGCCGATGTGGTCAG     |
| BMP-2 f               | GGGTGGAATGACTGGATTGT    |
| BMP-2 r               | GTCAAGGTACAGCATCGAGATAG |
| GAPDH f               | ACAGTCAGCCGCATCTTCTT    |
| GAPDH r               | AATGAAGGGGTCATTGATGG    |
| RUNX2 f               | CACTATCCAGCCACCTTTACTT  |
| RUNX2 r               | AGCGTCAACACCATCATTCT    |
| SP7 (Osterix) f       | CCTCTGCGGGACTCAACAAC    |
| SP7 (Osterix) r       | AGCCCATTAGTGCTTGTAAGG   |
| TGF $\beta$ 1 f       | GTGGAAACCCACAACGAAATC   |
| TGF $\beta$ 1 r       | GTGTCCAGGCTCCAAATGTA    |
| TBP f                 | GAATATAATCCCAAGCGGTTTG  |
| TBP r                 | ACTTCACATCACAGTCCCC     |
| $\beta$ ACTIN f       | GTTTGAGACCTTCAACACCC    |
| $\beta$ ACTIN r       | ATGTCACGCACGATTCCC      |
| UBC f                 | ATTTGGGTCGCGGTTCTTG     |
| UBC r                 | TGCCTTGACATTCTCGATGGT   |
